# Supplementary material for: Double-blinded randomized controlled trial to reveal the effects of Brazilian propolis intake on rheumatoid arthritis disease activity index; BeeDAI
Source: PLoS One. 2021 May 27;16(5):e0252357. doi: 10.1371/journal.pone.0252357 (PMC8158978; doi:10.1371/journal.pone.0252357)
Supplement: S1 File — (CSV) [file pone.0252357.s005.csv]

No	redcap_event_name	redcap_repeat_instrument	redcap_repeat_instance	doc_complete	age	iein01	iein02	iein03	iein04	iein05	iein06	iein07	iein08	ieex01	ieex02	ieex03	ieex04	ieex05	ieex06	ieex07	ieex08	ieex09	criterion_complete	randomization_complete	notification_complete	mh_yn	mhterm___ht	mhterm___dm	mhterm___hl	mhterm___id	mhterm___other	kiouyn	kiouterm___ht	kiouterm___dm	kiouterm___hl	kiouterm___id	kiouterm___other	smoke_yn	smoke_mo	alcole_mo	exercise_doctor	exercise_yn	exercise_number	exercise_minitus	sleep_time	eat_times	supplemen_bl	supplement_nm___gu	supplement_nm___com
1001	visit1_arm_1			0	69	1	1	1	1	1	1	1	1	0	0	0	0	0	0	0	0	0	2	2	0
1001	visit2_arm_1																									1	1	0	0	0	1	1	1	0	0	0	0	0		3	0	0			6	2	0	0	0
1001	visit3_arm_1
1001	visit4_arm_1
1001	visit5_arm_1
1002	visit1_arm_1			0	60	1	1	1	1	1	1	1	1	0	0	0	0	0	0	0	0	0	2	2	0
1002	visit2_arm_1																									1	1	0	0	0	0	1	0	0	0	0	1	1	3	3	0	1	7	30	6	3	1	0	0
1002	visit3_arm_1
1002	visit4_arm_1
1002	visit5_arm_1
1003	visit1_arm_1			0	56	1	1	1	1	1	1	1	1	0	0	0	0	0	0	0	0	0	2	2	0
1003	visit2_arm_1																									0	0	0	0	0	0	0	0	0	0	0	0	1	3	3	0	0			6	3	1	0	0
1003	visit3_arm_1
1003	visit4_arm_1
1003	visit5_arm_1
1004	visit1_arm_1			0	53	1	1	1	1	1	1	1	1	0	0	0	0	0	0	0	0	0	2	2	0
1004	visit2_arm_1																									0	0	0	0	0	0	1	0	0	0	1	1	0		2	0	0			6	3	0	0	0
1004	visit3_arm_1
1004	visit4_arm_1
1004	visit5_arm_1
1005	visit1_arm_1			0	63	1	1	1	1	1	1	1	1	0	0	0	0	0	0	0	0	0	2	2	0
1005	visit2_arm_1																									1	0	0	0	1	0	1	0	0	1	0	0	0		3	0	0			7	3	1	0	0
1005	visit3_arm_1
1005	visit4_arm_1
1005	visit5_arm_1
1006	visit1_arm_1			0	61	1	1	1	1	1	1	1	1	0	0	0	0	0	0	0	0	0	2	2	0
1006	visit2_arm_1																									0	0	0	0	0	0	0	0	0	0	0	0	0		2	0	0			7	2	0	0	0
1006	visit3_arm_1
1006	visit4_arm_1
1006	visit5_arm_1
1007	visit1_arm_1			0	51	1	1	1	1	1	1	1	1	0	0	0	0	0	0	0	0	0	2	2	0
1007	visit2_arm_1																									1	0	0	0	1	0	0	0	0	0	0	0	0		2	0	0			6	3	0	0	0
1007	visit3_arm_1
1007	visit4_arm_1
1007	visit5_arm_1
1008	visit1_arm_1			0	44	1	1	1	1	1	1	1	1	0	0	0	0	0	0	0	0	0	2	2	0
1008	visit2_arm_1																									1	0	0	0	1	0	0	0	0	0	0	0	0		3	0	0			6	2	0	0	0
1008	visit3_arm_1
1008	visit4_arm_1
1008	visit5_arm_1
1008	ae_arm_1	ae	1
1009	visit1_arm_1			0	58	1	1	1	1	1	1	1	1	0	0	0	0	0	0	0	0	0	2	2	0
1009	visit2_arm_1																									0	0	0	0	0	0	0	0	0	0	0	0	0		2	0	0			8	3	0	0	0
1009	visit3_arm_1
1009	visit4_arm_1
1009	visit5_arm_1
1010	visit1_arm_1			0	65	1	1	1	1	1	1	1	1	0	0	0	0	0	0	0	0	0	2	2	0
1010	visit2_arm_1																									1	0	0	0	1	0	0	0	0	0	0	0	0		2	0	1	4	60	7	3	0	0	0
1010	visit3_arm_1
1010	visit4_arm_1
1010	visit5_arm_1
1011	visit1_arm_1			0	66	1	1	1	1	1	1	1	1	0	0	0	0	0	0	0	0	0	2	2	0
1011	visit2_arm_1																									1	0	0	0	1	0	0	0	0	0	0	0	0		3	0	0			7	3	0	0	0
1011	visit3_arm_1
1011	visit4_arm_1
1011	visit5_arm_1
1011	ae_arm_1	ae	1
1011	ds_arm_1
1012	visit1_arm_1			0	60	1	1	1	1	1	1	1	1	0	0	0	0	0	0	0	0	0	2	2	0
1012	visit2_arm_1																									1	1	0	0	1	0	0	0	0	0	0	0	0		3	0	1	3	30	6.5	3	1	0	0
1012	visit3_arm_1
1012	visit4_arm_1
1012	visit5_arm_1
1013	visit1_arm_1			0	68	1	1	1	1	1	1	1	1	0	0	0	0	0	0	0	0	0	2	2	0
1013	visit2_arm_1																									1	1	0	0	0	0	1	0	0	0	0	1	0		3	0	0			6	3	1	0	0
1013	visit3_arm_1
1013	visit4_arm_1
1013	visit5_arm_1
1013	ae_arm_1	ae	1
1014	visit1_arm_1			0	53	1	1	1	1	1	1	1	1	0	0	0	0	0	0	0	0	0	2	2	0
1014	visit2_arm_1																									1	0	0	0	0	1	0	0	0	0	0	0	0		2	0	0			6	3	0	0	0
1014	visit3_arm_1
1014	visit4_arm_1
1014	visit5_arm_1
1015	visit1_arm_1			0	59	1	1	1	1	1	1	1	1	0	0	0	0	0	0	0	0	0	2	2	0
1015	visit2_arm_1																									0	0	0	0	0	0	0	0	0	0	0	0	0		3	0	0			7	3	0	0	0
1015	visit3_arm_1
1015	visit4_arm_1
1015	visit5_arm_1
1016	visit1_arm_1			0	47	1	1	1	1	1	1	1	1	0	0	0	0	0	0	0	0	0	2	2	0
1016	visit2_arm_1																									0	0	0	0	0	0	0	0	0	0	0	0	1	2	2	0	1	7	60	6	3	0	0	0
1016	visit3_arm_1
1016	visit4_arm_1
1016	visit5_arm_1
1017	visit1_arm_1			0	68	1	1	1	1	1	1	1	1	0	0	0	0	0	0	0	0	0	2	2	0
1017	visit2_arm_1																									0	0	0	0	0	0	0	0	0	0	0	0	0		3	0	1	2	60	6	3	0	0	0
1017	visit3_arm_1
1017	visit4_arm_1
1017	visit5_arm_1
1018	visit1_arm_1			0	68	1	1	1	1	1	1	1	1	0	0	0	0	0	0	0	0	0	2	2	0
1018	visit2_arm_1																									0	0	0	0	0	0	0	0	0	0	0	0	1	2	3	0	0			4.5	3	1	1	1
1018	visit3_arm_1
1018	visit4_arm_1
1018	visit5_arm_1
1019	visit1_arm_1			0	68	1	1	1	1	1	1	1	1	0	0	0	0	0	0	0	0	0	2	2	0
1019	visit2_arm_1																									1	1	0	0	0	1	0	0	0	0	0	0	0		3	0	0			5	3	0	0	0
1019	visit3_arm_1
1019	visit4_arm_1
1019	visit5_arm_1
1019	ae_arm_1	ae	1
1019	ae_arm_1	ae	2
1019	ae_arm_1	ae	3
1020	visit1_arm_1			0	57	1	1	1	1	1	1	1	1	0	0	0	0	0	0	0	0	0	2	2	0
1020	visit2_arm_1																									0	0	0	0	0	0	0	0	0	0	0	0	1	2	1	0	0			5	3	0	0	0
1020	visit3_arm_1
1020	visit4_arm_1
1020	visit5_arm_1
1020	ae_arm_1	ae	1
1021	visit1_arm_1			0	68	1	1	1	1	1	1	1	1	0	0	0	0	0	0	0	0	0	2	2	0
1021	visit2_arm_1																									1	0	0	0	0	1	1	0	0	0	0	1	0		3	0	1	6	30	7	3	1	1	0
1021	visit3_arm_1
1021	visit4_arm_1
1021	visit5_arm_1
1022	visit1_arm_1			0	54	1	1	1	1	1	1	1	1	0	0	0	0	0	0	0	0	0	2	2	0
1022	visit2_arm_1																									0	0	0	0	0	0	1	0	0	0	0	1	1	1	2	0	0			7	3	0	0	0
1022	visit3_arm_1
1022	visit4_arm_1
1022	visit5_arm_1
1022	ae_arm_1	ae	1
1023	visit1_arm_1			0	64	1	1	1	1	1	1	1	1	0	0	0	0	0	0	0	0	0	2	2	0
1023	visit2_arm_1																									0	0	0	0	0	0	0	0	0	0	0	0	1	1	1	0	1	6	15	7	3	0	0	0
1023	visit3_arm_1
1023	visit4_arm_1
1023	visit5_arm_1
1024	visit1_arm_1			0	48	1	1	1	1	1	1	1	1	0	0	0	0	0	0	0	0	0	2	2	0
1024	visit2_arm_1																									0	0	0	0	0	0	0	0	0	0	0	0	0		3	0	0			7	3	1	0	0
1024	visit3_arm_1
1024	visit4_arm_1
1024	visit5_arm_1
1024	ae_arm_1	ae	1
1024	ae_arm_1	ae	2
1025	visit1_arm_1			0	66	1	1	1	1	1	1	1	1	0	0	0	0	0	0	0	0	0	2	2	0
1025	visit2_arm_1																									1	1	0	0	0	0	0	0	0	0	0	0	0		1	0	0			5	3	0	0	0
1025	visit3_arm_1
1025	visit4_arm_1
1025	visit5_arm_1
1025	ae_arm_1	ae	1
2027	visit1_arm_1			0	59	1	1	1	1	1	1	1	1	0	0	0	0	0	0	0	0	0	2	2	0
2027	visit2_arm_1																									0	0	0	0	0	0	1	0	0	0	0	1	0		3	0	1	7	60	7	3	0	0	0
2027	visit3_arm_1
2027	visit4_arm_1
2027	visit5_arm_1
2028	visit1_arm_1			0	58	1	1	1	1	1	1	1	1	0	0	0	0	0	0	0	0	0	2	2	0
2028	visit2_arm_1																									0	0	0	0	0	0	0	0	0	0	0	0	1	3	2	0	0			6	3	1	0	0
2028	visit3_arm_1
2028	visit4_arm_1
2028	visit5_arm_1
2028	ae_arm_1	ae	1
2029	visit1_arm_1			0	68	1	1	1	1	1	1	1	1	0	0	0	0	0	0	0	0	0	2	2	0
2029	visit2_arm_1																									0	0	0	0	0	0	0	0	0	0	0	0	0		2	0	0			5	3	0	0	0
2029	visit3_arm_1
2029	visit4_arm_1
2029	visit5_arm_1
2030	visit1_arm_1			0	48	1	1	1	1	1	1	1	1	0	0	0	0	0	0	0	0	0	2	2	0
2030	visit2_arm_1																									0	0	0	0	0	0	0	0	0	0	0	0	0		2	0	0			7	2	0	0	0
2030	visit3_arm_1
2030	visit4_arm_1
2030	visit5_arm_1
2031	visit1_arm_1			0	60	1	1	1	1	1	1	1	1	0	0	0	0	0	0	0	0	0	2	2	0
2031	visit2_arm_1																									0	0	0	0	0	0	1	0	0	0	0	1	0		3	0	1	3	60	7	3	1	0	0
2031	visit3_arm_1
2031	visit4_arm_1
2031	visit5_arm_1
2032	visit1_arm_1			0	32	1	1	1	1	1	1	1	1	0	0	0	0	0	0	0	0	0	2	2	0
2032	visit2_arm_1																									0	0	0	0	0	0	0	0	0	0	0	0	0		3	0	0			5	3	0	0	0
2032	visit3_arm_1
2032	visit4_arm_1
2032	visit5_arm_1
2033	visit1_arm_1			0	65	1	1	1	1	1	1	1	1	0	0	0	0	0	0	0	0	0	2	2	0
2033	visit2_arm_1																									1	0	0	0	0	1	0	0	0	0	0	0	0		2	0	0			5	3	0	0	0
2033	visit3_arm_1
2033	visit4_arm_1
2033	visit5_arm_1
2033	ae_arm_1	ae	1
2034	visit1_arm_1			0	45	1	1	1	1	1	1	1	1	0	0	0	0	0	0	0	0	0	2	2	0
2034	visit2_arm_1																									1	0	0	0	0	1	0	0	0	0	0	0	0		3	0	0			7	3	0	0	0
2034	visit3_arm_1
2034	visit4_arm_1
2034	visit5_arm_1
2035	visit1_arm_1			0	64	1	1	1	1	1	1	1	1	0	0	0	0	0	0	0	0	0	2	2	0
2035	visit2_arm_1																									1	1	0	1	0	0	1	0	0	0	0	1	1	1	1	0	0			5	3	0	0	0
2035	visit3_arm_1
2035	visit4_arm_1
2035	visit5_arm_1
2036	visit1_arm_1			0	50	1	1	1	1	1	1	1	1	0	0	0	0	0	0	0	0	0	2	2	0
2036	visit2_arm_1																									1	1	0	0	0	0	0	0	0	0	0	0	0		1	0	0			6	3	0	0	0
2036	visit3_arm_1
2036	visit4_arm_1
2036	visit5_arm_1
2037	visit1_arm_1			0	60	1	1	1	1	1	1	1	1	0	0	0	0	0	0	0	0	0	2	2	0
2037	visit2_arm_1																									1	0	0	1	0	0	0	0	0	0	0	0	0		3	0	1	4	60	7	3	0	0	0
2037	visit3_arm_1
2037	visit4_arm_1
2037	visit5_arm_1
2038	visit1_arm_1			0	50	1	1	1	1	1	1	1	1	0	0	0	0	0	0	0	0	0	2	2	0
2038	visit2_arm_1																									1	0	0	0	1	0	0	0	0	0	0	0	0		2	0	0			7	3	0	0	0
2038	visit3_arm_1
2038	visit4_arm_1
2038	visit5_arm_1
2038	ds_arm_1
2039	visit1_arm_1			0	65	1	1	1	1	1	1	1	1	0	0	0	0	0	0	0	0	0	2	2	0
2039	visit2_arm_1																									0	0	0	0	0	0	1	0	0	0	0	1	0		3	0	1	1	90	6	3	0	0	0
2039	visit3_arm_1
2039	visit4_arm_1
2039	visit5_arm_1
2040	visit1_arm_1			0	57	1	1	1	1	1	1	1	1	0	0	0	0	0	0	0	0	0	2	2	0
2040	visit2_arm_1																									0	0	0	0	0	0	0	0	0	0	0	0	0		3	0	0			7	3	0	0	0
2040	visit3_arm_1
2040	visit4_arm_1
2040	visit5_arm_1
2041	visit1_arm_1			0	60	1	1	1	1	1	1	1	1	0	0	0	0	0	0	0	0	0	2	2	0
2041	visit2_arm_1																									1	0	1	0	0	0	0	0	0	0	0	0	0		2	0	0			5	3	0	0	0
2041	visit3_arm_1
2041	visit4_arm_1
2041	visit5_arm_1
2042	visit1_arm_1			0	69	1	1	1	1	1	1	1	1	0	0	0	0	0	0	0	0	0	2	2	0
2042	visit2_arm_1																									1	1	0	0	0	0	0	0	0	0	0	0	0		2	0	1	1	300	5.5	3	0	0	0
2042	visit3_arm_1
2042	visit4_arm_1
2042	visit5_arm_1
2043	visit1_arm_1			0	63	1	1	1	1	1	1	1	1	0	0	0	0	0	0	0	0	0	2	2	0
2043	visit2_arm_1																									0	0	0	0	0	0	0	0	0	0	0	0	0		3	0	1	7	20	7	3	0	0	0
2043	visit3_arm_1
2043	visit4_arm_1
2043	visit5_arm_1
2044	visit1_arm_1			0	54	1	1	1	1	1	1	1	1	0	0	0	0	0	0	0	0	0	2	2	0
2044	visit2_arm_1																									0	0	0	0	0	0	1	0	0	0	0	1	0		3	0	0			6	3	0	0	0
2044	visit3_arm_1
2044	visit4_arm_1
2044	visit5_arm_1
2044	ae_arm_1	ae	1
2045	visit1_arm_1			0	68	1	1	1	1	1	1	1	1	0	0	0	0	0	0	0	0	0	2	2	0
2045	visit2_arm_1																									1	1	0	1	0	0	1	0	0	0	0	1	1	3	2	0	0			6	3	0	0	0
2045	visit3_arm_1
2045	visit4_arm_1
2045	visit5_arm_1
2046	visit1_arm_1			0	63	1	1	1	1	1	1	1	1	0	0	0	0	0	0	0	0	0	2	2	0
2046	visit2_arm_1																									1	0	0	0	0	1	0	0	0	0	0	0	0		3	0	0			5	3	0	0	0
2046	visit3_arm_1
2046	visit4_arm_1
2046	visit5_arm_1
2047	visit1_arm_1			0	63	1	1	1	1	1	1	1	1	0	0	0	0	0	0	0	0	0	2	2	0
2047	visit2_arm_1																									0	0	0	0	0	0	1	0	0	0	0	1	0		3	0	0			6	3	0	0	0
2047	visit3_arm_1
2047	visit4_arm_1
2047	visit5_arm_1
2047	ds_arm_1
2048	visit1_arm_1			0	55	1	1	1	1	1	1	1	1	0	0	0	0	0	0	0	0	0	2	2	0
2048	visit2_arm_1																									0	0	0	0	0	0	0	0	0	0	0	0	0		2	0	0			4	3	1	0	0
2048	visit3_arm_1
2048	visit4_arm_1
2048	visit5_arm_1
2049	visit1_arm_1			0	61	1	1	1	1	1	1	1	1	0	0	0	0	0	0	0	0	0	2	2	0
2049	visit2_arm_1																									0	0	0	0	0	0	1	0	0	0	0	1	0		2	0	0			7	3	0	0	0
2049	visit3_arm_1
2049	visit4_arm_1
2049	visit5_arm_1
2050	visit1_arm_1			0	66	1	1	1	1	1	1	1	1	0	0	0	0	0	0	0	0	0	2	2	0
2050	visit2_arm_1																									1	1	0	0	0	1	0	0	0	0	0	0	0		1	0	0			6	3	0	0	0
2050	visit3_arm_1
2050	visit4_arm_1
2050	visit5_arm_1
2050	ds_arm_1
2051	visit1_arm_1			0	68	1	1	1	1	1	1	1	1	0	0	0	0	0	0	0	0	0	2	2	0
2051	visit2_arm_1																									0	0	0	0	0	0	1	0	0	0	0	1	0		3	0	0			7	3	0	0	0
2051	visit3_arm_1
2051	visit4_arm_1
2051	visit5_arm_1
2052	visit1_arm_1			0	69	1	1	1	1	1	1	1	1	0	0	0	0	0	0	0	0	0	2	2	0
2052	visit2_arm_1																									0	0	0	0	0	0	0	0	0	0	0	0	0		3	0	0			6	3	0	0	0
2052	visit3_arm_1
2052	visit4_arm_1
2052	visit5_arm_1
2052	ds_arm_1
2053	visit1_arm_1			0	67	1	1	1	1	1	1	1	1	0	0	0	0	0	0	0	0	0	2	2	0
2053	visit2_arm_1																									0	0	0	0	0	0	1	0	0	1	0	0	0		1	0	0			6	3	0	0	0
2053	visit3_arm_1
2053	visit4_arm_1
2053	visit5_arm_1
2054	visit1_arm_1			0	53	1	1	1	1	1	1	1	1	0	0	0	0	0	0	0	0	0	2	2	0
2054	visit2_arm_1																									1	0	0	0	0	1	1	0	0	0	0	1	0		2	0	0			6	3	0	0	0
2054	visit3_arm_1
2054	visit4_arm_1
2054	visit5_arm_1
2054	ae_arm_1	ae	1
2054	ae_arm_1	ae	2
2054	ae_arm_1	ae	3
2054	ds_arm_1
2055	visit1_arm_1			0	68	1	1	1	1	1	1	1	1	0	0	0	0	0	0	0	0	0	2	2	0
2055	visit2_arm_1																									0	0	0	0	0	0	0	0	0	0	0	0	0		3	0	0			6	3	0	0	0
2055	visit3_arm_1
2055	visit4_arm_1
2055	visit5_arm_1
2056	visit1_arm_1			0	64	1	1	1	1	1	1	1	1	0	0	0	0	0	0	0	0	0	2	2	0
2056	visit2_arm_1																									0	0	0	0	0	0	1	0	0	0	0	1	0		2	0	0			7	3	0	0	0
2056	visit3_arm_1
2056	visit4_arm_1
2056	visit5_arm_1
2056	ds_arm_1
2057	visit1_arm_1			0	69	1	1	1	1	1	1	1	1	0	0	0	0	0	0	0	0	0	2	2	0
2057	visit2_arm_1																									0	0	0	0	0	0	0	0	0	0	0	0	0		3	0	1	3	10	6.5	3	0	0	0
2057	visit3_arm_1
2057	visit4_arm_1
2057	visit5_arm_1
2057	ae_arm_1	ae	1
2058	visit1_arm_1			0	56	1	1	1	1	1	1	1	1	0	0	0	0	0	0	0	0	0	2	2	0
2058	visit2_arm_1																									0	0	0	0	0	0	1	0	0	0	0	1	1	3	3	0	0			5	3	1	0	0
2058	visit3_arm_1
2058	visit4_arm_1
2058	visit5_arm_1
2059	visit1_arm_1			0	57	1	1	1	1	1	1	1	1	0	0	0	0	0	0	0	0	0	2	2	0
2059	visit2_arm_1																									0	0	0	0	0	0	1	0	0	0	0	1	1	2	3	0	0			6	3	1	0	0
2059	visit3_arm_1
2059	visit4_arm_1
2059	visit5_arm_1
2060	visit1_arm_1			0	55	1	1	1	1	1	1	1	1	0	0	0	0	0	0	0	0	0	2	2	0
2060	visit2_arm_1																									1	1	0	0	1	1	0	0	0	0	0	0	0		2	0	1	1	10	5	3	0	0	0
2060	visit3_arm_1
2060	visit4_arm_1
2060	visit5_arm_1
2060	ae_arm_1	ae	1
2061	visit1_arm_1			0	62	1	1	1	1	1	1	1	1	0	0	0	0	0	0	0	0	0	2	2	0
2061	visit2_arm_1																									0	0	0	0	0	0	0	0	0	0	0	0	0		2	0	0			6	3	1	0	0
2061	visit3_arm_1
2061	visit4_arm_1
2061	visit5_arm_1
2061	ae_arm_1	ae	1
2062	visit1_arm_1			0	69	1	1	1	1	1	1	1	1	0	0	0	0	0	0	0	0	0	2	2	0
2062	visit2_arm_1																									0	0	0	0	0	0	0	0	0	0	0	0	0		2	0	1	3	120	6	3	0	0	0
2062	visit3_arm_1
2062	visit4_arm_1
2062	visit5_arm_1
2062	ae_arm_1	ae	1
2063	visit1_arm_1			0	62	1	1	1	1	1	1	1	1	0	0	0	0	0	0	0	0	0	2	2	0
2063	visit2_arm_1																									0	0	0	0	0	0	0	0	0	0	0	0	1	1	1	0	0			7	3	0	0	0
2063	visit3_arm_1
2063	visit4_arm_1
2063	visit5_arm_1
2064	visit1_arm_1			0	59	1	1	1	1	1	1	1	1	0	0	0	0	0	0	0	0	0	2	2	0
2064	visit2_arm_1																									0	0	0	0	0	0	1	0	0	0	0	1	0		2	0	0			6	3	0	0	0
2064	visit3_arm_1
2064	visit4_arm_1
2064	visit5_arm_1
2064	ae_arm_1	ae	1
2065	visit1_arm_1			0	57	1	1	1	1	1	1	1	1	0	0	0	0	0	0	0	0	0	2	2	0
2065	visit2_arm_1																									0	0	0	0	0	0	0	0	0	0	0	0	0		2	0	0			7	3	0	0	0
2065	visit3_arm_1
2065	visit4_arm_1
2065	visit5_arm_1
2066	visit1_arm_1			0	55	1	1	1	1	1	1	1	1	0	0	0	0	0	0	0	0	0	2	2	0
2066	visit2_arm_1																									0	0	0	0	0	0	1	1	0	0	0	0	0		3	0	0			5	3	1	0	0
2066	visit3_arm_1
2066	visit4_arm_1
2066	visit5_arm_1
2066	ae_arm_1	ae	2
2066	ae_arm_1	ae	1
2067	visit1_arm_1			0	68	1	1	1	1	1	1	1	1	0	0	0	0	0	0	0	0	0	2	2	0
2067	visit2_arm_1																									0	0	0	0	0	0	0	0	0	0	0	0	1	3	3	0	0			7	3	1	0	0
2067	visit3_arm_1
2067	visit4_arm_1
2067	visit5_arm_1
2068	visit1_arm_1			0	69	1	1	1	1	1	1	1	1	0	0	0	0	0	0	0	0	0	2	2	0
2068	visit2_arm_1																									0	0	0	0	0	0	0	0	0	0	0	0	0		2	0	0			8	3	0	0	0
2068	visit3_arm_1
2068	visit4_arm_1
2068	visit5_arm_1
2068	ae_arm_1	ae	1
2068	ds_arm_1
2069	visit1_arm_1			0	64	1	1	1	1	1	1	1	1	0	0	0	0	0	0	0	0	0	2	2	0
2069	visit2_arm_1																									0	0	0	0	0	0	1	0	0	0	0	1	0		3	0	1	6	60	4	4	1	0	0
2069	visit3_arm_1
2069	visit4_arm_1
2069	visit5_arm_1
2069	ae_arm_1	ae	1
2070	visit1_arm_1			0	64	1	1	1	1	1	1	1	1	0	0	0	0	0	0	0	0	0	2	2	0
2070	visit2_arm_1																									0	0	0	0	0	0	0	0	0	0	0	0	0		3	0	1	3	20	7	3	1	0	0
2070	visit3_arm_1
2070	visit4_arm_1
2070	visit5_arm_1
2070	ae_arm_1	ae	1
2071	visit1_arm_1			0	31	1	1	1	1	1	1	1	1	0	0	0	0	0	0	0	0	0	2	2	0
2071	visit2_arm_1																									0	0	0	0	0	0	0	0	0	0	0	0	0		2	0	0			6	3	1	0	0
2071	visit3_arm_1
2071	visit4_arm_1
2071	visit5_arm_1
2072	visit1_arm_1			0	64	1	1	1	1	1	1	1	1	0	0	0	0	0	0	0	0	0	2	2	0
2072	visit2_arm_1																									1	0	0	0	0	1	1	0	0	0	0	1	0		3	0	0			6	3	0	0	0
2072	visit3_arm_1
2072	visit4_arm_1
2072	visit5_arm_1
2072	ae_arm_1	ae	1
2073	visit1_arm_1			0	69	1	1	1	1	1	1	1	1	0	0	0	0	0	0	0	0	0	2	2	0
2073	visit2_arm_1																									1	0	0	1	0	0	0	0	0	0	0	0	0		2	0	0			6	3	0	0	0
2073	visit3_arm_1
2073	visit4_arm_1
2073	visit5_arm_1
2074	visit1_arm_1			0	59	1	1	1	1	1	1	1	1	0	0	0	0	0	0	0	0	0	2	2	0
2074	visit2_arm_1																									0	0	0	0	0	0	1	0	0	0	0	1	0		2	0	0			5	4	1	0	0
2074	visit3_arm_1
2074	visit4_arm_1
2074	visit5_arm_1
3059	visit1_arm_1			0	54	1	1	1	1	1	1	1	1	0	0	0	0	0	0	0	0	0	2	2	0
3059	visit2_arm_1																									1	0	0	0	0	1	1	0	0	0	0	1	0		2	0	0			8	3	1	0	1
3059	visit3_arm_1
3059	visit4_arm_1
3059	visit5_arm_1
3060	visit1_arm_1			0	57	1	1	1	1	1	1	1	1	0	0	0	0	0	0	0	0	0	2	2	0
3060	visit2_arm_1																									0	0	0	0	0	0	0	0	0	0	0	0	0		2	0	0			6	3	1	0	0
3060	visit3_arm_1
3060	visit4_arm_1
3060	visit5_arm_1
3061	visit1_arm_1			0	69	1	1	1	1	1	1	1	1	0	0	0	0	0	0	0	0	0	2	2	0
3061	visit2_arm_1																									1	1	0	1	0	0	0	0	0	0	0	0	0		3	0	0			7	3	1	0	0
3061	visit3_arm_1
3061	visit4_arm_1
3061	visit5_arm_1
3062	visit1_arm_1			0	69	1	1	1	1	1	1	1	1	0	0	0	0	0	0	0	0	0	2	2	0
3062	visit2_arm_1																									1	1	0	0	0	0	0	0	0	0	0	0	0		3	1	1	1	60	5	3	0	0	0
3062	visit3_arm_1
3062	visit4_arm_1
3062	visit5_arm_1
3062	ae_arm_1	ae	1
3063	visit1_arm_1			0	65	1	1	1	1	1	1	1	1	0	0	0	0	0	0	0	0	0	2	2	0
3063	visit2_arm_1																									1	0	1	1	0	0	1	0	0	0	0	1	0		3	0	0			6	3	0	0	0
3063	visit3_arm_1
3063	visit4_arm_1
3063	visit5_arm_1
3064	visit1_arm_1			0	60	1	1	1	1	1	1	1	1	0	0	0	0	0	0	0	0	0	2	2	0
3064	visit2_arm_1																									0	0	0	0	0	0	0	0	0	0	0	0	1	3	3	0	0			5	3	1	0	0
3064	visit3_arm_1
3064	visit4_arm_1
3064	visit5_arm_1
3064	ae_arm_1	ae	1
3065	visit1_arm_1			0	68	1	1	1	1	1	1	1	1	0	0	0	0	0	0	0	0	0	2	2	0
3065	visit2_arm_1																									1	1	0	0	0	0	0	0	0	0	0	0	0		3	0	1	4	60	7	3	0	0	0
3065	visit3_arm_1
3065	visit4_arm_1
3065	visit5_arm_1
[truncated: 164 more columns]
